# Supplementary material for: Integrative analysis of mRNA and miRNA expression profiles reveals seven potential diagnostic biomarkers for non-small cell lung cancer
Source: PubMed Central journal article supplement — Oncol Rep. 2019 Nov 13;43(1):99–112. doi: 10.3892/or.2019.7407 (PMC6908938; doi:10.3892/or.2019.7407), 2019-11-13
Supplement: Supplementary_Data.pdf [file Supplementary_Data.pdf]

Table SI. Primers used in this study.

| Gene                            | Orientation | Sequences (5'-3')       |
|---------------------------------|-------------|-------------------------|
| <i>TPO2A</i>                    | Forward     | ACCATTGCAGCCTGTAAATGA   |
|                                 | Reverse     | GGGCGGAGCAAAATATGTTCC   |
| <i>CCNBI</i>                    | Forward     | TTCGCCTGAGCCTATTTTGGTA  |
|                                 | Reverse     | AGCTCCATCTTCTGCATCCACAT |
| <i>RACGAP1</i>                  | Forward     | ACAGGGACACATTAGCTTTCCTC |
|                                 | Reverse     | CTGACTTCACTTGAGCATTGGAG |
| <i>BIRC5</i>                    | Forward     | AGGACCACCGCATCTCTACAT   |
|                                 | Reverse     | AAGTCTGGCTCGTTCTCAGTG   |
| <i>TTK</i>                      | Forward     | CGCAGCTTTCTGTAGAAATGGA  |
|                                 | Reverse     | GAGCATCACTTAGCGGAACAC   |
| <i><math>\beta</math>-actin</i> | Forward     | CCTGGCACCCAGCACAAT      |
|                                 | Reverse     | GGGCCGGACTCGTCATAC      |

*TPO2A*, DNA topoisomerase II  $\alpha$ ; *CCNBI*, cyclin B1; *RACGAP1*, Rac GTPase activating protein 1; *BIRC5*, baculoviral IAP repeat containing 5; *TTK*, TTK protein kinase.

Table SII. Results of the multivariate logistic regression analysis of miRNAs in the TCGA database.

| Factors        | logOR   | S.E.   | Sig.  | OR     | 95% CI for OR |        |
|----------------|---------|--------|-------|--------|---------------|--------|
|                |         |        |       |        | Lower         | Upper  |
| hsa-miR-21-5p  | 2.514   | 0.793  | 0.002 | 12.351 | 2.608         | 58.496 |
| hsa-miR-301-5p | -0.343  | 0.675  | 0.612 | 0.710  | 0.189         | 2.667  |
| hsa-miR193b-3p | 1.143   | 0.687  | 0.096 | 3.138  | 0.816         | 12.059 |
| hsa-miR-210-3p | 0.760   | 0.274  | 0.006 | 2.137  | 1.249         | 3.657  |
| Constant       | -45.463 | 21.065 | 0.031 | <0.001 |               |        |

TCGA, The Cancer Genome Atlas; OR, odds ratio; CI, confidence interval.

Table SIII. Results of the multivariate logistic regression analysis of mRNAs in the TCGA database.

| Factors      | logOR   | S.E.  | Sig.   | OR     | 95% CI for OR |         |
|--------------|---------|-------|--------|--------|---------------|---------|
|              |         |       |        |        | Lower         | Upper   |
| <i>TOP2A</i> | 4.187   | 1.018 | <0.001 | 65.800 | 8.944         | 484.068 |
| <i>CCNB1</i> | 4.149   | 1.105 | <0.001 | 63.349 | 7.264         | 552.490 |
| <i>BIRC5</i> | -1.379  | 0.662 | 0.037  | 0.252  | 0.069         | 0.922   |
| Constant     | -12.502 | 2.252 | <0.001 | <0.001 |               |         |

TCGA, The Cancer Genome Atlas; OR, odds ratio; CI, confidence interval. *TPO2A*, DNA topoisomerase II  $\alpha$ ; *CCNB1*, cyclin B1; *BIRC5*, baculoviral IAP repeat containing 5.

Table SIV. Results of the multivariate logistic regression analysis of the miRNAs in our tissue samples.

| Factors         | logOR  | S.E.  | Sig.   | OR     | 95% CI for OR |       |
|-----------------|--------|-------|--------|--------|---------------|-------|
|                 |        |       |        |        | Lower         | Upper |
| hsa-miR-193b-3p | 0.715  | 0.251 | 0.004  | 2.043  | 1.250         | 3.342 |
| hsa-miR-21-5p   | 0.431  | 0.180 | 0.016  | 1.539  | 1.083         | 2.188 |
| hsa-miR-31-5p   | 0.443  | 0.229 | 0.053  | 1.558  | 0.995         | 2.440 |
| hsa-miR-210-3p  | 0.346  | 0.216 | 0.109  | 1.414  | .925          | 2.161 |
| Constant        | -8.401 | 2.387 | <0.001 | <0.001 |               |       |

OR, odds ratio; CI, confidence interval.

Table SV. Results of the multivariate logistic regression analysis of the mRNAs in our tissue samples.

| Factors      | logOR  | S.E.  | Sig.  | OR    | 95% CI for OR |        |
|--------------|--------|-------|-------|-------|---------------|--------|
|              |        |       |       |       | Lower         | Upper  |
| <i>BIRC5</i> | -0.104 | 0.193 | 0.589 | 0.901 | 0.617         | 1.315  |
| <i>CCNB1</i> | 1.229  | 0.939 | 0.191 | 3.417 | 0.542         | 21.519 |
| <i>TOP2A</i> | 0.662  | 0.215 | 0.002 | 1.939 | 1.273         | 2.953  |
| Constant     | -6.679 | 2.115 | 0.002 | 0.001 |               |        |

OR, odds ratio; CI, confidence interval. *TPO2A*, DNA topoisomerase II  $\alpha$ ; *CCNB1*, cyclin B1; *BIRC5*, baculoviral IAP repeat containing 5.
